# Supplementary material
Source: PubMed Central journal article supplement (PMC8611484)
Supplement: jama-e2119415-s004.pdf [file jama-e2119415-s004.pdf]

## Data Sharing Statement

### Data

**Data available:** Yes

**Data types:** Deidentified participant data, Data dictionary

**How to access data:** We will share all data that support published results of the trial.

Additional data that have not been published will be withheld until at least six months after publication. Data will be made available as required for specific, approved analyses. Data will be provided from locked, cleaned, and de-identified study database. Requests will be reviewed by the Principal investigator prior to approval.

**When available:** beginning date: 01-01-2022, end date: 12-31-2026

### Supporting Documents

**Document types:** Statistical/analytic code, Informed consent form

**How to access documents:** By contacting the principal investigator Kim Bennell on [k.bennell@unimelb.edu.au](mailto:k.bennell@unimelb.edu.au)

**When available:** beginning date: 01-01-2022, end date: 12-31-2026

### Additional Information

**Who can access the data:** The investigators endorse the concept of data sharing to advance medical science. All requests for data sharing will be reviewed by the principal investigator to ensure no conflict with the planned subanalyses and to ensure that the data are shared in an ethical and protected manner.

**Types of analyses:** Analyses aimed to improve treatment of knee osteoarthritis for non-commercial purposes are eligible.

**Mechanisms of data availability:** Data will be made available after review and approval by the PI. Before any analysis, a signed Confidentiality Agreement and/or Data Sharing Agreement is required.
